# Supplementary material for: The Development of Thematic Core Collections in Cassava Based on Yield, Disease Resistance, and Root Quality Traits
Source: MDPI journal article supplement (doi:10.3390/plants12193474), 2023-10-04
Supplement: s1 [file s1]

## Supplementary material

**Table S3.** Geographical location and characterization of the cassava field trials.

| Year | Experimental Design <sup>1</sup> | Location  | City           | Altitude (m) | Coordinates                | Soil type <sup>2</sup> |
|------|----------------------------------|-----------|----------------|--------------|----------------------------|------------------------|
| 2011 | RCBD                             | Embrapa   | Cruz das Almas | 215          | 12°40'36.7"S, 39°05'08.0"W | YL                     |
|      | RCBD                             | Embrapa   | Cruz das Almas | 210          | 12°40'32.6"S, 39°05'13.7"W | YL                     |
| 2012 | ABD                              | Embrapa   | Cruz das Almas | 215          | 12°40'36.7"S, 39°05'08.0"W | YL                     |
|      | ABD                              | Embrapa   | Cruz das Almas | 210          | 12°40'32.6"S, 39°05'13.7"W | YL                     |
|      | ABD                              | Embrapa   | Cruz das Almas | 200          | 12°40'47.4"S, 39°05'00.2"W | YL                     |
|      | RCBD                             | Coopamido | Laje           | 180          | 13°06'38.4"S, 39°16'20.4"W | RL                     |
|      | RCBD                             | UFRB      | Cruz das Almas | 210          | 12°39'25.9"S, 39°04'58.8"W | YL                     |
| 2013 | RCBD                             | Embrapa   | Cruz das Almas | 210          | 12°40'32.6"S, 39°05'13.7"W | YL                     |
|      | RCBD                             | Embrapa   | Cruz das Almas | 217          | 12°40'22.8"S, 39°05'06.1"W | YL                     |
|      | ABD                              | Embrapa   | Cruz das Almas | 216          | 12°40'22.8"S, 39°05'01.5"W | YL                     |
|      | ABD                              | Embrapa   | Cruz das Almas | 216          | 12°40'22.8"S, 39°05'01.5"W | YL                     |
|      | ABD                              | Coopamido | Laje           | 180          | 13°06'39.6"S, 39°16'17.6"W | YL                     |
|      | ABD                              | Coopamido | Laje           | 175          | 13°06'35.6"S, 39°16'19.3"W | YL                     |
|      | ABD                              | Embrapa   | Cruz das Almas | 216          | 12°40'22.8"S, 39°05'01.5"W | YL                     |
|      | RCBD                             | Coopamido | Laje           | 180          | 13°06'39.6"S, 39°16'17.6"W | YL                     |
|      | ABD                              | Embrapa   | Cruz das Almas | 216          | 12°40'22.8"S, 39°05'01.5"W | YL                     |
|      | ABD                              | Bahiamido | Laje           | 196          | 13°06'38.5"S, 39°16'49.0"W | YL                     |
| 2015 | ABD                              | Bahiamido | Valença        | 40           | 13°15'33.5"S, 39°14'12.8"W | YRL                    |
|      | ABD                              | UFRB      | Cruz das Almas | 210          | 12°39'16.4"S, 39°04'53.4"W | YL                     |
|      | ABD                              | Bahiamido | Laje           | 296          | 13°06'38.5"S, 39°16'49.0"W | YL                     |
|      | ABD                              | Embrapa   | Cruz das Almas | 216          | 12°40'19.5"S, 39°05'02.5"W | YL                     |
|      | ABD                              | Embrapa   | Cruz das Almas | 216          | 12°40'19.5"S, 39°05'02.5"W | YL                     |
|      | ABD                              | Embrapa   | Cruz das Almas | 216          | 12°40'19.5"S, 39°05'02.5"W | YL                     |
|      | ABD                              | Embrapa   | Cruz das Almas | 216          | 12°40'19.5"S, 39°05'02.5"W | YL                     |
| 2016 | ABD                              | Embrapa   | Cruz das Almas | 216          | 12°40'19.5"S, 39°05'02.5"W | YL                     |
|      | ABD                              | Embrapa   | Cruz das Almas | 216          | 12°40'19.5"S, 39°05'02.5"W | YL                     |
| 2017 | ABD                              | Embrapa   | Cruz das Almas | 216          | 12°40'19.5"S, 39°05'02.5"W | YL                     |
| 2018 | RCBD                             | UFRB      | Cruz das Almas | 223          | 12°39'51.4"S, 39°04'15.7"W | YL                     |
|      | RCBD                             | UFRB      | Cruz das Almas | 223          | 12°39'43.5"S, 39°04'12.0"W | YL                     |
| 2019 | RCBD                             | UFRB      | Cruz das Almas | 223          | 12°39'43.5"S, 39°04'12.0"W | YL                     |
|      | RCBD                             | UFRB      | Cruz das Almas | 223          | 12°39'43.5"S, 39°04'12.0"W | YL                     |
| 2020 | RCBD                             | UFRB      | Cruz das Almas | 223          | 12°39'49.2"S, 39°03'58.1"W | YL                     |
|      | RCBD                             | UFRB      | Cruz das Almas | 225          | 12°39'49.2"S, 39°03'58.1"W | YL                     |
| 2021 | ABD                              | UFRB      | Cruz das Almas | 225          | 12°39'49.2"S, 39°03'58.1"W | YL                     |

<sup>1</sup>RCBD: randomized complete block design, ABD: augmented block design; <sup>2</sup>LA - yellow latosol; LV - red latosol; LVA - yellow red latosol.
