# Supplementary material for: The Development of Thematic Core Collections in Cassava Based on Yield, Disease Resistance, and Root Quality Traits
Source: MDPI journal article supplement (doi:10.3390/plants12193474), 2023-10-04
Supplement: s1 [file s1]

## Supplementary material

**Table S2.** The broad-sense heritability ( $h^2$ ) of the quantitative traits used in the establishment of thematic collections

| N.º | Trait                             | Abbreviation | $h^2$ |
|-----|-----------------------------------|--------------|-------|
| 1.  | Plant height                      | Pl.H         | 0.503 |
| 2.  | Plant type                        | Pl.T         | 0.415 |
| 3.  | Shoot yield                       | ShY          | 0.407 |
| 4.  | Marketable fresh root yield       | C.FRY        | 0.230 |
| 5.  | Unmarketable fresh root yield     | NC.FRY       | 0.147 |
| 6.  | Total fresh root yield            | T.FRY        | 0.383 |
| 7.  | Dry matter content                | DMC          | 0.395 |
| 8.  | Dry root yield                    | DRY          | 0.345 |
| 9.  | Harvest index                     | HI           | 0.343 |
| 10. | Leaf retention                    | Pl.LR        | 0.213 |
| 11. | Plant vigor at 1.5 months         | Pl.V1.5M     | 0.230 |
| 12. | Plant vigor at 12 months          | Pl.V12M      | 0.600 |
| 13. | Average number of roots per plant | Ro.NP        | 0.147 |
| 14. | Mite severity                     | P.MS         | 0.466 |
| 15. | Bacterial blight severity         | D.CBB        | 0.157 |
| 16. | Rust severity                     | D.RS         | 0.279 |
| 17. | Frogskin severity                 | D.FS         | 0.099 |
| 18. | Hydrogen cyanide content          | Ro.HCN       | 0.916 |
| 19. | Total carotenoid content          | Ro.TCC       | 0.953 |
