# Supplementary material for: The Development of Thematic Core Collections in Cassava Based on Yield, Disease Resistance, and Root Quality Traits
Source: MDPI journal article supplement (doi:10.3390/plants12193474), 2023-10-04
Supplement: s1 [file s1]

## Supplementary material

**Table S1.** Pairs of cassava genotypes with relatedness >0.95 obtained through identity by state (IBS) using 20,023 SNPs on 172 cassava individuals selected from different thematic collections (CC\_Root\_quality - root quality and CC\_Yield - for yield traits).

|                        |                          |                                 |
|------------------------|--------------------------|---------------------------------|
| 1- BGM-0082/ BGM-0091  | 37- BGM-0817/ BGM-1423   | 73- BGM-0250/ BGM-1679          |
| 2- BGM-0123/ BGM-0248  | 38- BGM-0341/ BGM-1429   | 74- BGM-1227/ BGM-1679          |
| 3- BGM-0123 /BGM-0250  | 39- BGM-0817/ BGM-1429   | 75- BGM-1569/ BGM-1679          |
| 4- BGM-0248/ BGM-0250  | 40- BGM-1423/ BGM-1429   | 76- BGM-0145/ BGM-1716          |
| 5- BGM-0213/ BGM-0286  | 41- BGM-0307/ BGM-1465   | 77- BGM-0145/ BGM-1721          |
| 6- BGM-0287/ BGM-0303  | 42- BGM-0341/ BGM-1474   | 78- BGM-1716/ BGM-1721          |
| 7- BGM-0215/ BGM-0316  | 43- BGM-0817/ BGM-1474   | 79- BGM-0368/ BGM-1817          |
| 8- BGM-0093/ BGM-0320  | 44- BGM-1423/ BGM-1474   | 80- BGM-0882/ BGM-1817          |
| 9- BGM-0287/ BGM-0389  | 45- BGM-1429/ BGM-1474   | 81 - BGM-0123/ BGM-1834         |
| 10- BGM-0303/ BGM-0389 | 46- BGM-1359/ BGM-1489   | 82- BGM-0248/ BGM-1834          |
| 11- BGM-0287/ BGM-0442 | 47- BGM-1361/ BGM-1489   | 83- BGM-0250/ BGM-1834          |
| 12- BGM-0303/ BGM-0442 | 48- BGM-1371/ BGM-1489   | 84- BGM-1227/ BGM-1834          |
| 13- BGM-0389/ BGM-0442 | 49- BGM-0579/ BGM-1498   | 85- BGM-1569/ BGM-1834          |
| 14- BGM-0527/ BGM-0529 | 50- BGM-1496/ BGM-1502-M | 86- BGM-1679/ BGM-1834          |
| 15- BGM-0270/ BGM-0591 | 51- BGM-0341/ BGM-1507   | 87- BGM-0341/ BGM-1880          |
| 16- BGM-0384/ BGM-0601 | 52- BGM-0817/ BGM-1507   | 88- BGM-0817/ BGM-1880          |
| 17- BGM-0408/ BGM-0694 | 53- BGM-1423/ BGM-1507   | 89- BGM-1423/ BGM-1880          |
| 18- BGM-0341/ BGM-0817 | 54- BGM-1429/ BGM-1507   | 90- BGM-1429/ BGM-1880          |
| 19- BGM-0368/ BGM-0882 | 55- BGM-1474/ BGM-1507   | 91- BGM-1474/ BGM-1880          |
| 20- BGM-0212/ BGM-1034 | 56- BGM-0123/ BGM-1569   | 92- BGM-1507/ BGM-1880          |
| 21- BGM-0666/ BGM-1064 | 57- BGM-0248/ BGM-1569   | 93- BGM-0093/ BGM-2234          |
| 22- BGM-0533/ BGM-1130 | 58- BGM-0250/ BGM-1569   | 94- BGM-0320/ BGM-2234          |
| 23- BGM-0123/ BGM-1227 | 59- BGM-1227/ BGM-1569   | 95- BGM-1626/ BGM-2234          |
| 24- BGM-0248/ BGM-1227 | 60- BGM-1078/ BGM -1624  | 96- BGM-0341/ BGM-2245          |
| 25- BGM-0250/ BGM-1227 | 61- BGM-0093/ BGM-1626   | 97- BGM-0817/ BGM-2245          |
| 26- BGM-0287/ BGM-1269 | 62- BGM-0320/ BGM-1626   | 98- BGM-1423/ BGM-2245          |
| 27- BGM-0303/ BGM-1269 | 63- BGM-0666/ BGM-1638   | 99- BGM-1429/ BGM-2245          |
| 28- BGM-0389/ BGM-1269 | 64- BGM-1064/ BGM-1638   | 100- BGM-1474/ BGM-2245         |
| 29- BGM-0442/ BGM-1269 | 65- BGM-0189/ BGM-1643   | 101- BGM-1507/ BGM-2245         |
| 30- BGM-0212/ BGM-1355 | 66- BGM-0189/ BGM-1671   | 102- BGM-1880/ BGM-2245         |
| 31- BGM-1034/ BGM-1355 | 67- BGM-1643/ BGM-1671   | 103- BGM-1311/ BGM-2275         |
| 32- BGM-1359/ BGM-1361 | 68- BGM-0189/ BGM-1677   | 104- BGM-2095/ BGM-2339         |
| 33- BGM-1359/ BGM-1371 | 69- BGM-1643/ BGM-1677   | 105- BGM-1249/ BGM-2355         |
| 34- BGM-1361/ BGM-1371 | 70- BGM-1671/ BGM-1677   | 106- BGM-2249/ BGM-2356         |
| 35- BGM-0443/ BGM-1395 | 71- BGM-0123/ BGM-1679   | 107- BGM-0579/ BRS-Amansa-Burro |
| 36- BGM-0341/ BGM-1423 | 72- BGM-0248/ BGM-1679   | 108- BGM-1498/ BRS-Amansa-Burro |
